## **Effects of vitamin D deficiency on blood lipids and bone metabolism: a large cross-sectional study**

Peng Gu<sup>1¶</sup>, Bin Pu<sup>1¶</sup>, BaiHang Chen<sup>1&</sup>,

XiaoHui Zheng<sup>1,2&</sup>, ZhanPeng Zeng<sup>1,2&</sup>, WeiDong Luo<sup>1,2\*</sup>

1 Guangzhou University of Chinese Medicine, Guangzhou, Guangdong, China

2 The First Affiliated Hospital, Guangzhou University of Chinese Medicine, Guangzhou, Guangdong, China

\* Correspondence

E-mail: 65225202@qq.com(WDL)

¶These authors contributed equally to this work.

&These authors also contributed equally to this work.

**Conflict of Interest** Peng Gu, Bin Pu, BaiHang Chen, XiaoHui Zheng, ZhanPeng Zeng and

WeiDong Luo declare that they have no conflict of interest.

**Grants and fellowships** This research did not receive any specific grant from funding agencies in the public, commercial, or not-for-profit sectors.

**NOTE:** This preprint reports new research that has not been certified by peer review and should not be used to guide clinical practice.

## Abstract

**Purpose** To investigate the relationship between serum HDL-C and spinal bone mineral density (BMD) under different serum 25-hydroxyvitamin D (25 (OH) D) levels in adults over 40 years old and to explore its mechanism.

**Methods** Participants over the age of 40 with data on HDL-C, 25 (OH) D, spinal BMD, and other variables in NHANES 2007–2010 were included in the final analysis. A weighted multiple linear regression model was used to evaluate the association between serum HDL-C and spinal BMD in different gender, ages and serum 25 (OH) D levels.

**Results** A total of 3599 subjects aged  $\geq 40$  years old were included in this study. Univariate analysis of the complete correction model showed a negative correlation between serum HDL-C and spinal BMD. In the two subgroups of serum 25(OH)D, we found that the higher the serum HDL-C in the female with serum 25 (OH) D  $< 75$ nmol/L aged 40-59 years old, the lower the total spinal BMD, and a similar relationship was found in the lumbar spine (L1-L4). However, no similar relationship was found in all populations with serum 25 (OH) D  $\geq 75$ nmol/L and males with serum 25 (OH) D  $< 75$ nmol/L.

**Conclusion** Among Americans over the age of 40, the increase of serum HDL-C is related to decreased BMD of spine only in women aged 40-59 years with vitamin D insufficiency or deficiency.

## Author summary

We performed a cross-sectional study using the National Health Examination and Nutrition Survey (NHANES) data. We found that increased serum high-density lipoprotein cholesterol (HDL-C) during vitamin D deficiency is a potential risk factor for osteopenia or osteoporosis in middle-aged and elderly American women.

**Keywords** Bone mineral density, 25-hydroxyvitamin D, High-density lipoprotein cholesterol, Osteoporosis, NHANES

## 1 **Introduction**

2 Osteoporosis (OP) is a systemic skeletal disease common in the elderly, which is characterized by  
3 reduced bone mass per unit volume, decreased bone strength, destruction of bone microstructure  
4 and increased risk of fracture(1). OP is often associated with brittle fractures, with approximately 1/2  
5 of women and 1/5 of men expected to experience an osteoporotic fracture during their lifetime(2).  
6 BMD is a standard parameter to evaluate bone health. There are many risk factors for BMD reduction,  
7 including genetic, lifestyle and nutrition factors, which have been identified to be related to BMD  
8 reduction(3-5). The existing evidence also showed that abnormal blood lipid metabolism(6-8) and  
9 serum vitamin D deficiency(9, 10) were closely related to osteoporosis. Patients with hyperlipidemia  
10 can have bone loss and osteoporotic fracture simultaneously. Patients with OP and osteopenia are  
11 also often complicated with abnormal blood lipid metabolism(11), especially the abnormal metabolism  
12 of serum HDL-C(12). Serum vitamin D is an essential factor in regulating the balance of calcium,  
13 phosphorus and bone metabolism, and the appropriate nutritional status of vitamin D is significant for  
14 the maintenance of bone health(13). Vitamin D deficiency is associated with various diseases harmful  
15 to bone health, including diabetes, chronic obstructive pulmonary disease(14), a variety of  
16 autoimmune diseases(15) and dyslipidemia(16).  
17 Existing studies indicated that serum HDL-C levels were negatively correlated with bone status in  
18 postmenopausal women with vitamin D deficiency(17). However, this relationship was only evaluated  
19 in postmenopausal women and did not extend to all age groups and men, and it was a single-center  
20 clinical study with a small sample size. This study conducted a cross-sectional study combining data  
21 from two cycles (2007-2008 and 2009-2010) of the National Health and Nutrition Examination Survey  
22 (NHANES) to provide more evidence-based references further. It was objective for the study to  
23 evaluate the association between serum HDL-C and BMD at different serum vitamin D levels and to  
24 provide guidance for regulating serum vitamin D and HDL-C levels to reduce the risk of osteopenia or  
25 OP.

## 26 **Methods**

### 27 **Data source and study design**

28 NHANES is a series of continuous cross-sectional surveys conducted jointly by the National Center  
29 For Health Statistics and the Centers for Disease Control And Prevention to include information about  
30 a representative general non-institutionalized population of all ages in the United States to assess

31 their nutrition and health status. It is reviewed and approved by the NCHS Research Ethics Review  
32 Board and obtained all participants' written and informed consent. This survey includes two parts:  
33 interview and physical examination data. The interview part mainly collects demographic data,  
34 questionnaire data, and dietary data. The physical examination mainly includes massive laboratory  
35 data and examination data. **Each individual in the database is replaced with a unique ID and does not**  
36 **include any personally identifiable private information.**

37 This study combines the data of NHANES 2007-2010. Inclusion criteria included: (1) participants  $\geq$  40  
38 years old, (2) participants with available spinal BMD, HDL-C, and 25 (OH) D data. Exclusion criteria  
39 included: (1) subjects who have been treated for osteoporosis (who have treated osteoporosis); (2)  
40 prednisone or cortisone every day (prednisone or cortisone tablets almost every day for a month or  
41 more?); (3) subjects with kidney weakness or failure (have you been told by your doctor or other  
42 health professionals that you have kidney weakness or failure? Does not include kidney stones,  
43 bladder infection or incontinence. )(4) subjects with missing data of other variables were excluded.  
44 Finally, among 20686 participants, through strict eligibility criteria, a total of 3599 participants were  
45 included in the study. (Fig 1) **Data collection/analysis for this study was conducted from January to**  
46 **March 2022. The date that participants were recruited to the study and the date range in which human**  
47 **subjects' data/samples visit <https://wwwn.cdc.gov/nchs/nhanes/Default.aspx>.**

#### 48 **Measurement of serum 25(OH)D level**

49 For the two cycles of NHANES 2007-2010, 25-hydroxyvitamin D3 (25(OH)D3), epi-25- hydroxyvitamin  
50 D3 (epi-25(OH)D3) and 25-hydroxyvitamin D2 (25(OH)D2) were determined by ultra-high-  
51 performance liquid chromatography-tandem mass spectrometry. Total 25-hydroxyvitamin D is the sum  
52 of 25-hydroxyvitamin D2 and 25-hydroxyvitamin D3 but does not include table 25-hydroxyvitamin D3.  
53 Detailed instructions on specimen collection and processing can be found on the NHANES  
54 websites([https://wwwn.cdc.gov/nchs/nhanes/2007-](https://wwwn.cdc.gov/nchs/nhanes/2007-2008/VID_E.htm)  
55 [2008/VID\\_E.htm](https://wwwn.cdc.gov/nchs/nhanes/2007-2008/VID_E.htm) and [https://wwwn.cdc.gov/nchs/nhanes/2009-2010/VID\\_F.htm](https://wwwn.cdc.gov/nchs/nhanes/2009-2010/VID_F.htm)). According to the  
56 guidelines for the evaluation, treatment, and prevention of vitamin D deficiency issued by the  
57 American Endocrine Association in July 2014, 25 (OH) D levels were divided into two groups: serum  
58 vitamin D insufficiency or deficiency group with total 25 (OH) D concentration  $<$  75nmol/L and serum  
59 vitamin D normal group with total 25 (OH) D concentration  $\geq$  75nmol/L(18).

#### 60 **Measurement of serum HDL-C level**

61 Subjects' sera were collected to measure HDL-C levels and all samples were analyzed at the  
62 University of Minnesota Lipid Laboratory using a Roche modular P chemical analyzer. Magnesium  
63 sulfate/glucose solution, cholesterol oxidase and polyethylene glycol coupled cholesterol esterase  
64 and other reagents were used for determination. These reagents are related to a laboratory method  
65 reference material in the cholesterol reference method laboratory network certified by the Centers for  
66 Disease Control and Prevention (CDC) Lipid Standardization Program, with no differences in the  
67 generation assays between measurements.

#### 68 **Measurement of results and covariates**

69 The outcome variables are the spinal BMD (total spinal BMD, L1-L4BMD) measured by dual-energy  
70 X-ray absorptiometry on the Hologic Discovery model A densitometer (Hologic, Inc., Bedford,  
71 Massachusetts). All scans were analyzed using Hologic APEX3.0 software. Covariates include  
72 demographic data, such as age, gender, race, education level, marital status, body mass index  
73 ( $\text{kg/m}^2$ ), C-reactive protein (mmol/L), serum total calcium concentration (mmol/L), phosphorus  
74 (mmol/L), total cholesterol (mmol/L), alkaline phosphatase (U/L), aspartate aminotransferase (U/L),  
75 glutamic pyruvic transaminase (U/L), smoking status, alcohol consumption, hypertension, diabetes.  
76 Covariates were collected through family interviews, physical examination, laboratory measurements,  
77 and questionnaires. For more details on data collection, visit  
78 <https://wwwn.cdc.gov/nchs/nhanes/ContinuousNhanes/Default.aspx?BeginYear=2007> and  
79 <https://wwwn.cdc.gov/nchs/nhanes/ContinuousNhanes/Default.aspx?BeginYear=2009>.

#### 80 **Statistical analysis**

81 To account for oversampling in complex survey design, survey nonresponse, and poststratification,  
82 the 2007/2008 and 2009/2010 cycles were combined, and 4-y sampling weights were constructed by  
83 using one-two of the 2-y sampling weight (WTMEC2YR) constructed by the NHANES. The baseline  
84 characteristics of all study participants were described by average (continuous variables) or  
85 proportions (classified variables). Weighted multiple linear regression model evaluated the linear  
86 relationship between serum HDL-C and BMD. Unadjusted and multivariate-adjusted logical  
87 regression analyses were used to calculate the P value and the corresponding 95% confidence  
88 interval (CI) to determine the relationship between serum HDL-C levels and spinal BMD. The coarse  
89 model was adjusted to no variable. The multivariate model included age, sex, race, smoking status,  
90 alcohol consumption, hypertension, diabetes, BMI, CRP, Ca, P, TC, ALP, AST, ALT. We selected

91 these confounding factors based on their association with more than 10% changes in the estimated  
92 results or effects of interest. Multiple linear regression models were used for subgroup analysis, and  
93 the linear relationship between serum HDL-C and spinal BMD in different populations was evaluated  
94 by sex, age, and serum 25 (OH) D stratification.  $P < 0.05$  is defined as significant. Multi-factor  
95 histogram was used to describe the independent association between BMD and HDL-C in different  
96 parts of a specific population. All analyses were conducted using R (version 4.0.3) and EmpowerStats  
97 software (<http://www.empowerstats.com>). The figures were generated using GraphPad Prism  
98 9.0.0(121) (<https://www.graphpad.com/>).

## 100 **Results**

### 101 **Participant selection and baseline characteristics**

102 Participants' information was extracted from the NHANES database 2007-2010. (i) exclusion of  
103 subjects younger than 40 (n = 12526), (ii) exclusion of subjects without spinal BMD data (n = 3338),  
104 (iii) exclusion of subjects without HDL-C, 25 (OH) D data (n = 488) (iv) excluding subjects who had  
105 treated osteoporosis, used or continued hormone therapy, and suffered from kidney weakness or  
106 failure (n=524) (v) excluded the missing values of other variables (n = 211). After that, 3599  
107 participants (Fig 1) participated in the final analysis. The database includes 1814 men and 1785  
108 women, the average age of men was  $54.09 \pm 10.33$  years old, most of them were non-Hispanic white  
109 (74.64%), college degree or above (58.47%), smoking (47.84%), drinking (at least 12 drinks in the  
110 past year) (85.03%), high blood pressure (35.98%), diabetes (10.23%). Male BMI ( $28.53 \pm 4.70\text{kg/m}^2$ ),  
111 25 (OH) D ( $67.04 \pm 22.53\text{nmol/l}$ ), ALT ( $30.77 \pm 25.05\text{U/L}$ ), AST ( $28.49 \pm 16.87\text{U}$ ), ALP ( $66.98$   
112  $\pm 20.58\text{U/L}$ ), TC ( $5.19 \pm 1.09\text{mmol/L}$ ), Ca ( $2.35 \pm 0.09\text{mmol/L}$ ), P ( $1.16 \pm 0.18\text{mmol/L}$ ), CRP ( $0.28$   
113  $\pm 0.59\text{mmol/L}$ ). The average BMD of total spine, L1, L2, L3 and L4 was  $1.06 \pm 0.15\text{g/cm}^2$ ,  $1.00$   
114  $\pm 0.14\text{g/cm}^2$ ,  $1.07 \pm 0.15\text{g/cm}^2$ ,  $1.08 \pm 0.16\text{g/cm}^2$  and  $1.08 \pm 0.16\text{g/cm}^2$ , respectively. The average age of  
115 women was  $54.11 \pm 10.44$ . most of the women were non-Hispanic whites (74.27%), college degree or  
116 above (58.96%), smoking (58.92%), alcohol consumption (67.82%), hypertension (33.74%), diabetes  
117 (8.69%), BMI ( $28.12 \pm 6.26\text{kg/m}^2$ ). 25 (OH) D ( $70.99 \pm 27.31\text{nmol/l}$ ), ALT ( $22.24 \pm 13.05\text{U/L}$ ), AST  
118 ( $24.51 \pm 11.28\text{U/L}$ ), ALP ( $68.47 \pm 22.09\text{U/L}$ ), TG ( $5.39 \pm 1.04\text{mmol/L}$ ), Ca ( $1.25 \pm 0.17\text{mmol/L}$ ), P ( $2.36$   
119  $\pm 0.09\text{mmol/L}$ ), CRP ( $0.41 \pm 0.76\text{mmol/L}$ ). The average BMD of total spine, L1, L2, L3 and L4 was  $1.00$   
120  $\pm 0.14\text{g/cm}^2$ ,  $0.90 \pm 0.15\text{g/cm}^2$ ,  $1.00 \pm 0.15\text{g/cm}^2$ ,  $1.04 \pm 0.15\text{g/cm}^2$ ,  $1.04 \pm 0.15\text{g/cm}^2$ ,  
121 respectively (Table 1).

### 122 **Relationship between serum HDL-C and BMD**

123 Serum HDL-C was negatively correlated with BMD, model 1 (without adjusting covariates). After  
124 adjusting for confounding factors, model 2 (age, sex, race/ethnicity were adjusted), and model 3 (all  
125 covariates were adjusted), all have similar results. There were significant differences in trend test  
126 results between the two groups ( $P < 0.05$ ) (Table 2).

### 127 **Relationship between serum HDL-C and BMD at different levels of serum 25 (OH) D**

128 In all covariant adjusted models, we observed that when serum 25 (OH) D  $< 75\text{nmol/l}$ , serum HDL-C  
129 was negatively correlated with total spine and L1-L4 BMD ( $P < 0.05$ ). However, when serum 25 (OH)

130 D  $\geq$  75nmol/l, there was no correlation between serum HDL-C and total spine and L1-L4 BMD (P>  
131 0.05) (Table 3).

132 Furthermore, the subgroup analysis of people with serum 25 (OH) D < 75nmol/l by sex and age  
133 showed that when serum 25 (OH) D < 75nmol/l, there were differences in the association between  
134 serum HDL-C level and BMD in different sex and age groups. When serum 25 (OH) D < 75nmol/l, the  
135 spine BMD(total spine and L1-L4) of men of all ages were not correlated with HDL-C (P > 0.05). The  
136 total spine, L1 and L4 BMD of female of 40  $\leq$  aged < 60, the L2 BMD of 40  $\leq$  Aged < 50 female and  
137 the L3 BMD of 50  $\leq$  Aged < 60 female were negatively correlated with serum HDL-C, while the L2  
138 BMD of 50  $\leq$  Aged < 60 female, the L3 BMD of 40  $\leq$  Aged < 50 female and the remaining 60-80 age  
139 group did not correlate with serum HDL-C (Table 4). Classification of Women aged 40-59 years with  
140 serum 25(OH)D<75nmol/l into low, middle and high groups based on the third quartile interval of  
141 serum HDL-C concentration, the results were a negative correlation between different serum HDL-C  
142 groups and BMD, and the association between BMD in different lumbar vertebrae was L1 < L2 < L3 <  
143 L4 (Fig 2).

#### 144 **Relationship between serum HDL-C and BMD based on horizontal stratification of covariates**

145 After stratified analysis of the relationship between serum HDL-C and spinal BMD by using all  
146 covariates (the covariates with continuous data as classified variables) as line stratified variables, it  
147 was found that the serum HDL-C of non-Hispanic blacks, people living with someone, smokers,  
148 people with education below high school level and people with highest ALP quartile had a negative  
149 correlation with spinal BMD (Table 5).

#### 150 **Discussion**

151 This study investigated the association between serum HDL-C and spinal BMD at different serum 25  
152 (OH) D levels among Americans over 40 years old in a nationally representative sample. After  
153 adjusting all covariates, the weighted multiple linear regression model analysis showed a significant  
154 negative correlation between serum HDL-C and BMD in women aged 40-59 years with serum 25  
155 (OH) D < 75nmol/L.

156 In the univariate analysis of serum HDL-C and spinal BMD, we found that there was a negative  
157 correlation between serum HDL-C and spinal BMD without adjustment of any covariable (Model1),  
158 sex, age and race (Model2) and after adjustment of all covariates (Model3)(Table 2). Some studies  
159 have found an inverse relationship between blood lipid levels and bone mass. For example, (1)



160 adipocytes in lipid metabolism and osteoblasts in osteocytes are differentiated from MSCs(19); a long-  
161 term high-fat diet promotes MSCs to differentiate into adipocytes rather than osteoblasts, thus  
162 inhibiting bone formation. (2) High-fat environment promotes the transformation of osteoblasts into  
163 adipocytes in bone marrow(20). (3) High-fat environment enhances the bone resorption function of  
164 osteoclasts by increasing the levels of Type I collagen carboxy-terminal peptide (CTX-1) and  
165 Thrombospondin Related Adhesive Protein (TRAP)(21). (4) High-fat environment causes massive  
166 blood lipids and lipoproteins deposition in the arterial wall and the matrix of the subendothelial layer of  
167 bone vessels, resulting in lipid peroxidation. Lipid peroxides accelerated the inflammatory reaction of  
168 the arterial wall and inhibited the differentiation and bone mineralization of osteocytes(22). This  
169 significant relationship is indistinguishable and includes all the components tested in the blood fat  
170 spectrum: TC, HDL-C, Low-density lipoprotein cholesterol (LDL-C) and Triglycerides (TG)(23).  
171 However, few studies on the correlation and mechanism between increased HDL-C and decreased  
172 BMD. Kha et al. reported that specific oxysterol could stimulate MSCs to differentiate into osteoblasts,  
173 while high serum HDL-C level can remove oxysterol from peripheral tissue, which has a negative  
174 impact on osteogenic differentiation(24). Dennison et al. found that serum high serum HDL-C level is  
175 related to higher fat content and higher body weight. There is a negative correlation between BMD  
176 and serum HDL-C in women, but the correlation decreases after adjusting the fat ratio(25). Jirapinyo  
177 et al. observed that oral estrogen/progesterone combination increased BMD but decreased serum  
178 HDL-C levels in postmenopausal women(26). Mazidi et al. found that serum HDL-C was positively  
179 correlated with inflammatory markers such as C-reactive protein, leukocyte and fibrinogen(27).  
180 Therefore, it can be speculated that serum HDL-C and bone metabolism mechanisms may be related  
181 to hormone deficiency and inflammatory response.  
182 In addition, the correlation between serum HDL-C and spinal BMD was different at separate serum 25  
183 (OH) D levels. Serum HDL-C was a negative correlation with total spine and L1-L4 BMD at serum 25  
184 (OH) D < 75nmol/l(P<0.05). However, when serum 25 (OH) D ≥ 75nmol/l, there was no correlation  
185 between total spine, L1-L4 BMD and HDL-C(P>0.05) (Table 3) . One possible mechanism is that  
186 1,25-(OH) 2D3 in serum 25 (OH) D can inhibit the secretion and mRNA expression of apolipoprotein  
187 AI (the main apolipoprotein of HDL-C), which makes the activity of apolipoprotein AI promoter  
188 decrease, affects the level and function of HDL-C(28-30), and then weakens the process of bone  
189 regeneration inhibition in the high-fat environment. Another possible mechanism is a positive

190 correlation between serum 25 (OH) D and BMD(28, 31), which reduces or even eliminates the  
191 correlation between serum HDL-C and BMD. The molecular mechanism is that serum 25 (OH) D  
192 regulates calcium homeostasis by affecting intestinal calcium absorption, renal calcium reabsorption  
193 and osteoclast bone resorption(32). Serum vitamin D can act on vitamin D response elements of  
194 osteoblasts and bone nuclei, and regulate the expression of osteocalcin, low-density lipoprotein  
195 receptor-related protein 5, fibroblast growth factor 23, type I collagen and other proteins, which has a  
196 substantial regulatory effect on bone turnover and bone mineralization(33).

197 To further explore the correlation between BMD and serum HDL-C and its possible mechanism in  
198 different populations with serum 25 (OH) D < 75nmol/L, we carried out a stratified analysis of sex and  
199 age in all populations with serum 25 (OH) D < 75nmol/L. The results showed that the correlation  
200 between serum HDL-C and BMD varies with gender and age when serum 25 (OH) D < 75 nmol/L.

201 The negative correlation between serum HDL-C and BMD only exists in the female population,  
202 especially those 40-59 years. It is similar to previous studies that have shown that the serum HDL-C  
203 level in postmenopausal women with osteopenia or OP is higher(17, 34, 35). There are several  
204 possible reasons for this difference. First, there are differences in the pathogenesis of osteoporosis  
205 between men and women. Hypercalciuria, abnormal testosterone metabolism level, hormone disorder  
206 related to bone metabolism and hypogonadism caused by aging are the leading causes of  
207 osteoporosis in older men(36), while estrogen deficiency caused by drastic changes of sex hormone  
208 levels in women aged 40-59 years may be the leading cause of OP in this age group(17, 37). Estrogen  
209 deficiency can increase apoptosis of osteoblasts, which can act on the estrogen receptor $\alpha$ (ER $\alpha$ )  
210 target of osteoblasts to inhibit the differentiation of osteoblasts and increase apoptosis, and also  
211 impede the production of receptor activator of nuclear factor- $\kappa$ B (RANK) by osteoblasts, T cells and B  
212 cells, and reduce the activity of osteoblasts (38). Estrogen deficiency in women before and after  
213 menopause will lead to a decrease in the level of osteoprotegerin (OPG), promote local bone  
214 inflammation and promote the expression of inflammatory cytokines. The increased expression of  
215 inflammatory factors can also enhance the activity of osteoclasts, which further leads to the  
216 aggravation of bone mass loss(39). Estrogen deficiency breaks the balance between bone formation  
217 and bone resorption(40). This process is not significant in elderly male. Secondly, studies have shown  
218 that changes in menopause can lead to distraction and depression, while depression may increase  
219 the risk of osteoporosis(41). Women's overall level of physical activity is lower than that of men(42).

220 The gender differences in bone size and geometry, bone histomorphometry and sex hormones may  
221 be the reasons for the difference in bone mass and degree of osteoporosis between men and  
222 women(43).

223 Most studies only confirmed a negative correlation between serum HDL-C and BMD. This study  
224 investigated the relationship between serum HDL-C and BMD by stratified analysis of sex, age, serum  
225 25 (OH) D level, and all covariables. The results showed a significant negative correlation between  
226 serum HDL-C and BMD in women aged 40-59 years old with serum 25 (OH) D < 75nmol/L. This  
227 correlation did not exist in women over 60 years old with serum 25 (OH) D < 75nmol/L, all males and  
228 all populations with 25 (OH) D ≥ 75nmol/L. Our results are more accurate and specific than the  
229 previous simple negative correlation between serum HDL-C and BMD. This was of great significance  
230 for clinicians and this population to closely observe BMD and early intervention to prevent OP. In  
231 addition, this study based on NHANES database data, the sample size is large, the clinical data are  
232 sufficient, and the study population based on the general population, which may be more  
233 representative than the population recruited from the hospital.

234 In this study, we also found that the  $\beta$  value and significance of the correlation between L1-L4BMD  
235 with serum HDL-C decreased in turn (Table 2), which indicated that the L1 BMD is significantly  
236 affected by the increase of serum HDL-C level, and the correlation was the most significant, followed  
237 by L2, L3, L4. The comparison of L1-L4 BMD in the original data of the included population also found  
238 that the relationship between lumbar BMD size of all subjects in the population was L1 < L2 < L3 < L4  
239 (Fig 3). A reasonable explanation may be that the decrease of spinal BMD begins at L1 or L1 BMD is  
240 more affected by bone mass loss caused by various factors such as aging, and this relationship was  
241 also found in a census study of lumbar vertebrae BMD(44).

242 The limitations of the study are stated below:

- 243 1. Because of its cross-sectional design, this study cannot accurately detect the causal  
244 relationship between serum HDL-C, serum 25 (OH) D levels and BMD.
- 245 2. We excluded patients who had kidney disease, treated osteoporosis, and took prednisone or  
246 cortisone tablets almost every day, so this study's conclusions could not be applied to them.
- 247 3. Collecting questionnaire data through questionnaires and interviews may lead to recall bias  
248 and affect the study's conclusions.

249 4. All the participants in this study are American residents, and the conclusions may not apply to  
250 all populations and races.

251 In general, more extensive data, rigorous experimental and multi-center designs are needed in the  
252 future to verify further the conclusion that serum HDL-C is negatively correlated with BMD, as well as  
253 more fundamental studies on the molecular level of HDL-C and bone metabolism to obtain a relatively  
254 more objective and reliable evidence-based basis.

255

## 256 **Supporting information**

257

258 **S1 Fig.** Flow chart of participants selection.

259

260 **S2 Fig.** Classification of Women aged 40-60 years with serum 25(OH)D<75nmol/l based on the tertile  
261 interval of HDL-C concentration, and the association between different HDL-C groups and BMD.

262

263 **S3 Fig.** Association between BMD and L1-L4 of adults over 40 years old.

264

265 **S1 Table. Characteristics of study sample: US population aged ≥40 years in the NHANES 2007-**  
266 **2010.** NHANES = National Health and Nutrition Examination Survey; SD = standard deviation; Values  
267 are mean ± SD or n (%).HDL-C = high-density lipoprotein cholesterol; BMI = Body mass index; CRP  
268 = C-reactive protein; TC = Cholesterol; ALP = Alkaline phosphatase; ALT = Alanine aminotransferase;  
269 AST = Aspartate aminotransferase; BMD = bone mineral density ; CI = confidence interval;  $\beta$   
270 regression coefficient

271

272 **S2 Table. Correlation between high-density lipoprotein-cholesterol and bone mineral density.**

273 Model1, no covariates were adjusted Model2, age,sex,race / ethnicity, were adjusted Model3, age,  
274 sex, race/ethnicity, Education, Smoking, Had at least 12 alcohol drinks past one year?, Marital  
275 status, Hypertension, Diabetes, Total 25(OH)D, BMI (obese, overweight, normal), TC (quartile  
276 groups), Ca (quartile groups), P (quartile groups), ALP (quartile groups), ALT (quartile groups), AST  
277 (quartile groups), CRP (quartile groups) were adjusted in the model.

278

279 **S3 Table. Correlation between high-density lipoprotein cholesterol and bone mineral density**  
280 **based on 25(OH)D status classification.** Age, sex, race/ethnicity, Education, Smoking, Had at least  
281 12 alcohol drinks past one year?, Marital status, Hypertension, Diabetes, BMI (obese, overweight,  
282 normal), TC (quartile groups), Ca (quartile groups), P (quartile groups), ALP (quartile groups), ALT

283 (quartile groups), AST (quartile groups), CRP (quartile groups) were adjusted in the model.

284

285 **S4 Table. Correlation between high-density lipoprotein cholesterol and bone mineral density**  
286 **based on Gender and Age status classification.** Race/ethnicity, Education, Smoking, Had at least  
287 12 alcohol drinks past one year?, Marital status, Hypertension, Diabetes, Total 25(OH)D, BMI (obese,  
288 overweight, normal), TC (quartile groups), Ca (quartile groups), P (quartile groups), ALP (quartile  
289 groups), ALT (quartile groups), AST (quartile groups), CRP (quartile groups) were adjusted in the model.

290

291

292 **S5 Table. Correlation between high-density lipoprotein cholesterol and bone mineral density**  
293 **based on covariate status classification.** Age, sex, Had at least 12 alcohol drinks past one year?,  
294 Hypertension, Diabetes, Total 25(OH)D, BMI (obese, overweight, normal), TC(quartile groups), Ca  
295 (quartile groups), P (quartile groups), ALT (quartile groups), AST (quartile groups), CRP (quartile  
296 groups) were adjusted in the model

297

## 298 **List of Abbreviations**

299 BMD, bone mineral density; HDL-C, high-density lipoprotein cholesterol; 25(OH)D, 25-hydroxyvitamin  
300 D; OP, Osteoporosis; NHANES, National Health and Nutrition Examination Survey; SD, standard  
301 deviation; CRP, C-reactive protein; BMI, body mass index; TC, Cholesterol; ALP, Alkaline  
302 phosphatase; ALT, Alanine aminotransferase; AST, Aspartate aminotransferase; CI, confidence  
303 interval

304 **Acknowledgements** None

305

## 306 **Author Contributions**

307 **Conceptualization:** Peng Gu, Bin Pu, WeiDong Luo.

308 **Data Curation:** BaiHang Chen.

309 **Formal Analysis:** Peng Gu, Bin Pu, XiaoHui Zheng, ZhanPeng Zeng, WeiDong Luo.

310 **Investigation :** Peng Gu, Bin Pu, BaiHang Chen.

311 **Methodology:** BaiHang Chen.

312 **Project Administration:** WeiDong Luo.

313 **Supervision:** WeiDong Luo.

314 **Validation:** XiaoHui Zheng, ZhanPeng Zeng.

315 **Visualization :** BaiHang Chen.

316 **Writing – Original Draft Preparation:** Peng Gu, Bin Pu, WeiDong Luo.

317 **Writing – Review & Editing:** Peng Gu, Bin Pu, WeiDong Luo.

318

319 **Funding:** None

320

321 **Ethics approval and consent to participate** The original survey was approved by the  
322 NCHS Research Ethics Review Board and all adult participants provided written informed  
323 consent. The present analysis was deemed exempt by the Institutional Review Board at  
324 our institution, as the dataset used in the analysis was completely de-identified.

325

326 **Data availability** Some or all data generated or analyzed during this study are included in  
327 this published article or in the data repositories listed in References. NHANES data is available  
328 publically at <https://wwwn.cdc.gov/nchs/nhanes/Default.aspx>

329

330

## References:

- 331 1. Ukon Y, Makino T, Kodama J, Tsukazaki H, Tateiwa D, Yoshikawa H, et al. Molecular-Based Treatment  
332 Strategies for Osteoporosis: A Literature Review. *Int J Mol Sci.* 2019;20(10):2557.  
333 <http://doi.org/10.3390/ijms20102557>
- 334 2. Greenblatt MB, Tsai JN, Wein MN. Bone Turnover Markers in the Diagnosis and Monitoring of Metabolic  
335 Bone Disease. *Clin Chem.* 2017;63(2):464-74. <http://doi.org/10.1373/clinchem.2016.259085>
- 336 3. Cvijetic S, Colic BI, Satalic Z. Influence of heredity and environment on peak bone density: a parent-  
337 offspring study. *J Clin Densitom.* 2010;13(3):301-6. <http://doi.org/10.1016/j.jocd.2010.03.003>
- 338 4. Rondanelli M, Faliva MA, Barrile GC, Cavioni A, Mansueto F, Mazzola G, et al. Nutrition, Physical Activity,  
339 and Dietary Supplementation to Prevent Bone Mineral Density Loss: A Food Pyramid. *Nutrients.*  
340 2022;14(1):74. <http://doi.org/10.3390/nu14010074>
- 341 5. Sambol SZ, Stimac D, Orlic ZC, Guina T. Haematological, biochemical and bone density parameters in  
342 vegetarians and non-vegetarians. *The West Indian medical journal.* 2009;58(6):512-7.
- 343 6. Begic Z, Balic D, Rizvanovic M. The Association Between Lipid Profile and Bone Density in  
344 Postmenopausal Women. *Medical Archives.* 2012;66(6):378. <http://doi.org/10.5455/medarh.2012.66.378-381>
- 345 7. Brownbill RA, Ilich JZ. Lipid profile and bone paradox: higher serum lipids are associated with higher bone  
346 mineral density in postmenopausal women. *Journal of women's health (Larchmont, N.Y.)*. 2002;  
347 2006;15(3):261.
- 348 8. Sprini D, Rini GB, Di Stefano L, Cianferotti L, Napoli N. Correlation between osteoporosis and  
349 cardiovascular disease. *Clinical cases in mineral and bone metabolism.* 2014;11(2):117-9.  
350 <http://doi.org/10.11138/ccmbm/2014.11.2.117>
- 351 9. Alkhenizan A, Mahmoud A, Hussain A, Gabr A, Alsoghayer S, Eldali A. The Relationship between 25 (OH)  
352 D Levels (Vitamin D) and Bone Mineral Density (BMD) in a Saudi Population in a Community-Based  
353 Setting. *Plos One.* 2017;12(1):e169122. <http://doi.org/10.1371/journal.pone.0169122>
- 354 10. Sun J, Zhao M, Hou Y, Zhang C, Oh J, Sun Z, et al. Circulating serum vitamin D levels and total body bone  
355 mineral density: A Mendelian randomization study. *J Cell Mol Med.* 2019;23(3):2268-71.  
356 <http://doi.org/10.1111/jcmm.14153>
- 357 11. Hu X, Ma S, Yang C, Wang W, Chen L. Relationship between senile osteoporosis and cardiovascular and  
358 cerebrovascular diseases. *Exp Ther Med.* 2019;17(6):4417-20. <http://doi.org/10.3892/etm.2019.7518>
- 359 12. D'Amelio P, Pescarmona GP, Gariboldi A, Isaia GC. High density lipoproteins (HDL) in women with  
360 postmenopausal osteoporosis: a preliminary study. *Menopause.* 2001;8(6):429-32.  
361 <http://doi.org/10.1097/00042192-200111000-00008>
- 362 13. Winzenberg T, Powell S, Shaw KA, Jones G. Effects of vitamin D supplementation on bone density in  
363 healthy children: systematic review and meta-analysis. *BMJ (Clinical research ed.)*. 2011;342:c7254.  
364 <http://doi.org/10.1136/bmj.c7254>
- 365 14. Sertpoyraz FM, Deniz S. Bone mineral density and vitamin D levels in patients with group a COPD. *The*  
366 *Aging Male.* 2020;23(5):873-8. <http://doi.org/10.1080/13685538.2019.1612869>
- 367 15. Vitamin D: importance in the prevention of cancers, type 1 diabetes, heart disease, and osteoporosis1 - 5.
- 368 16. Leung HH, Galano J, Crauste C, Durand T, Lee JC. Combination of Lutein and Zeaxanthin, and DHA  
369 Regulated Polyunsaturated Fatty Acid Oxidation in H2O2-Stressed Retinal Cells. *Neurochem Res.*  
370 2020;45(5):1007-19. <http://doi.org/10.1007/s11064-020-02994-4>
- 371 17. Maghbooli Z, Khorrami-nezhad L, Adabi E, Ramezani M, Asadollahpour E, Razi F, et al. Negative  
372 correlation of high-density lipoprotein-cholesterol and bone mineral density in postmenopausal Iranian  
373 women with vitamin D deficiency. *Menopause.* 2018;25(4):458-64.  
374 <http://doi.org/10.1097/GME.0000000000001082>
- 375 18. Holick MF, Binkley NC, Bischoff-Ferrari HA, Gordon CM, Hanley DA, Heaney RP, et al. Evaluation,  
376 treatment, and prevention of vitamin D deficiency: an Endocrine Society. *The Journal of clinical*  
377 *endocrinology and metabolism.* 2011;96(7):1911-30. <http://doi.org/10.1210/jc.2011-0385>
- 378 19. Hu L, Yin C, Zhao F, Ali A, Ma J, Qian A. Mesenchymal Stem Cells: Cell Fate Decision to Osteoblast or  
379 Adipocyte and Application in Osteoporosis Treatment. *Int J Mol Sci.* 2018;19(2):360.  
380 <http://doi.org/10.3390/ijms19020360>
- 381 20. Paspaliaris V, Kolios G. Stem cells in Osteoporosis: From Biology to New Therapeutic Approaches. *Stem*  
382 *Cells Int.* 2019;2019:1-16. <http://doi.org/10.1155/2019/1730978>
- 383 21. Yabing WKSM. Research progress in the mechanism of action of transforming growth factor- $\beta$  in  
384 bone metabolism. *Chin J Osteoporos.* 2020;26(02):308-12.
- 385 22. Parhami F, Morrow AD, Balucan J, Leitinger N, Watson AD, Tintut Y, et al. Lipid oxidation products have  
386 opposite effects on calcifying vascular cell and bone cell differentiation. A possible explanation for the  
387



- 388 paradox of arterial calcification in osteoporotic patients. *Arteriosclerosis, thrombosis, and vascular biology*.  
389 1997;17(4):680-7.
- 390 23. Hsu Y, Venners SA, Terwedow HA, Feng Y, Niu T, Li Z, et al. Relation of body composition, fat mass, and  
391 serum lipids to osteoporotic fractures and bone mineral density in Chinese men and women. *The American*  
392 *journal of clinical nutrition*. 2006;83(1):146-54.
- 393 24. Kha HT, Basseri B, Shouhed D, Richardson J, Tetradis S, Hahn TJ, et al. Oxysterols Regulate Differentiation  
394 of Mesenchymal Stem Cells: Pro-Bone and Anti-Fat. *J Bone Miner Res*. 2004;19(5):830-40.  
395 <http://doi.org/10.1359/jbmr.040115>
- 396 25. Dennison EM, Syddall HE, Aihie Sayer A, Martin HJ, Cooper C. Lipid profile, obesity and bone mineral  
397 density: the Hertfordshire Cohort Study. *QJM*. 2007;100(5):297-303. <http://doi.org/10.1093/qjmed/hcm023>
- 398 26. Effect of combined oral estrogen/ progestogen preparation (Kliogest1) on bone mineral density, plasma lipids  
399 and postmenopausal symptoms in HRT-naïve Thai women.
- 400 27. Mazidi M, Mikhailidis DP, Banach M. Associations between risk of overall mortality, cause-specific  
401 mortality and level of inflammatory factors with extremely low and high high-density lipoprotein cholesterol  
402 levels among American adults. *Int J Cardiol*. 2019;276:242-7. <http://doi.org/10.1016/j.ijcard.2018.11.095>
- 403 28. Heikkinen AM, Tuppurainen MT, Niskanen L, Komulainen M, Penttilä I, Saarikoski S. Long-term vitamin  
404 D3 supplementation may have adverse effects on serum lipids during postmenopausal hormone replacement  
405 therapy.; 1997. p. 495-502.
- 406 29. Shi H, Norman AW, Okamura WH, Sen A, Zemel MB.  $1\alpha,25$ -dihydroxyvitamin D3  
407 inhibits uncoupling protein 2 expression in human adipocytes. *The FASEB Journal*. 2002;16(13):1-20.  
408 <http://doi.org/10.1096/fj.02-0255fje>
- 409 30. Wehmeier K, Beers A, Haas MJ, Wong NCW, Steinmeyer A, Zugel U, et al. Inhibition of apolipoprotein AI  
410 gene expression by  $1,25$ -dihydroxyvitamin D3. *Biochimica et biophysica acta*. 2005;1737(1):16-26.
- 411 31. von Mühlen DG, Greendale GA, Garland CF, Wan L, Barrett-Connor E. Vitamin D, parathyroid hormone  
412 levels and bone mineral density in community-dwelling older women: The Rancho Bernardo Study.  
413 *Osteoporosis Int*. 2005;16(12):1721-6. <http://doi.org/10.1007/s00198-005-1910-8>
- 414 32. Nadeem SM, Rafique I, Hayder I, Irshad R, Bashir S, Ullah R, et al. Comparison of vitamin D levels with  
415 bone density, calcium, phosphate and alkaline phosphatase - an insight from major cities of Pakistan. *J Pak*  
416 *Med Assoc*. 2018;68(4):543-7.
- 417 33. Haussler MR, Whitfield GK, Kaneko I, Haussler CA, Hsieh D, Hsieh J, et al. Molecular Mechanisms of  
418 Vitamin D Action. *Calcified Tissue Int*. 2013;92(2):77-98. <http://doi.org/10.1007/s00223-012-9619-0>
- 419 34. Buizert PJ, van Schoor NM, Lips P, Deeg DJ, Eekhoff EM. Lipid Levels: A Link Between Cardiovascular  
420 Disease and Osteoporosis? *J Bone Miner Res*. 2009;24(6):1103-9. <http://doi.org/10.1359/jbmr.081262>
- 421 35. Jeong I, Cho SW, Kim SW, Choi HJ, Park KS, Kim SY, et al. Lipid Profiles and Bone Mineral Density in  
422 Pre- and Postmenopausal Women in Korea. *Calcified Tissue Int*. 2010;87(6):507-12.  
423 <http://doi.org/10.1007/s00223-010-9427-3>
- 424 36. Adler RA. Update on osteoporosis in men. *Best Pract Res Cl En*. 2018;32(5):759-72.  
425 <http://doi.org/10.1016/j.beem.2018.05.007>
- 426 37. Briot K, Roux C, Thomas T, Blain H, Buchon D, Chapurlat R, et al. 2018 update of French recommendations  
427 on the management of postmenopausal osteoporosis. *Joint Bone Spine*. 2018;85(5):519-30.  
428 <http://doi.org/10.1016/j.jbspin.2018.02.009>
- 429 38. Windahl SH, Börjesson AE, Farman HH, Engdahl C, Movérare-Skrtic S, Sjögren K, et al. Estrogen receptor-  
430  $\alpha$  in osteocytes is important for trabecular bone formation in male mice. *Proceedings of the National*  
431 *Academy of Sciences*. 2013;110(6):2294-9. <http://doi.org/10.1073/pnas.1220811110>
- 432 39. Kun G, Weiji Y, Quan L, Qinong M, Jinlong Y, Jinquan L, et al. Study on the relationship between the ratio  
433 of neutrophil to lymphocyte and osteoporosis. *Chin J Osteoporos*. 2019;25(08):1134-7.
- 434 40. WEI Shuangshuang Z, Zhifen HZEA. Effects of estrogen on Wnt16,  $\beta$ -catenin, OPG, RANKL expression  
435 in bone tissue of ovariectomized rats. *Zhejiang Medicine*. 2017;39(04):245-9.
- 436 41. Fedor-Freybergh P. The influence of oestrogens on the wellbeing and mental performance in climacteric and  
437 postmenopausal women. *Acta Obstet Gynecol Scand Suppl*. 1977;64:1-91.
- 438 42. Vari R, Scazzocchio B, D'Amore A, Giovannini C, Gessani S, Masella R. Gender-related differences in  
439 lifestyle may affect health status. *Annali dell'Istituto superiore di sanita*. 2016;52(2):158-66.  
440 [http://doi.org/10.4415/ANN\\_16\\_02\\_06](http://doi.org/10.4415/ANN_16_02_06)
- 441 43. Nieves JW. Sex-Differences in Skeletal Growth and Aging. *Curr Osteoporos Rep*. 2017;15(2):70-5.  
442 <http://doi.org/10.1007/s11914-017-0349-0>
- 443 44. Bin XGZX. The related research of antero-posterior lumbar spine bone  
444 mineral density data of 2 205 healthy men in Shanghai. *J Southeast Univ ( Med Sci Edi )*. 2016;35(3):301-  
445 4.



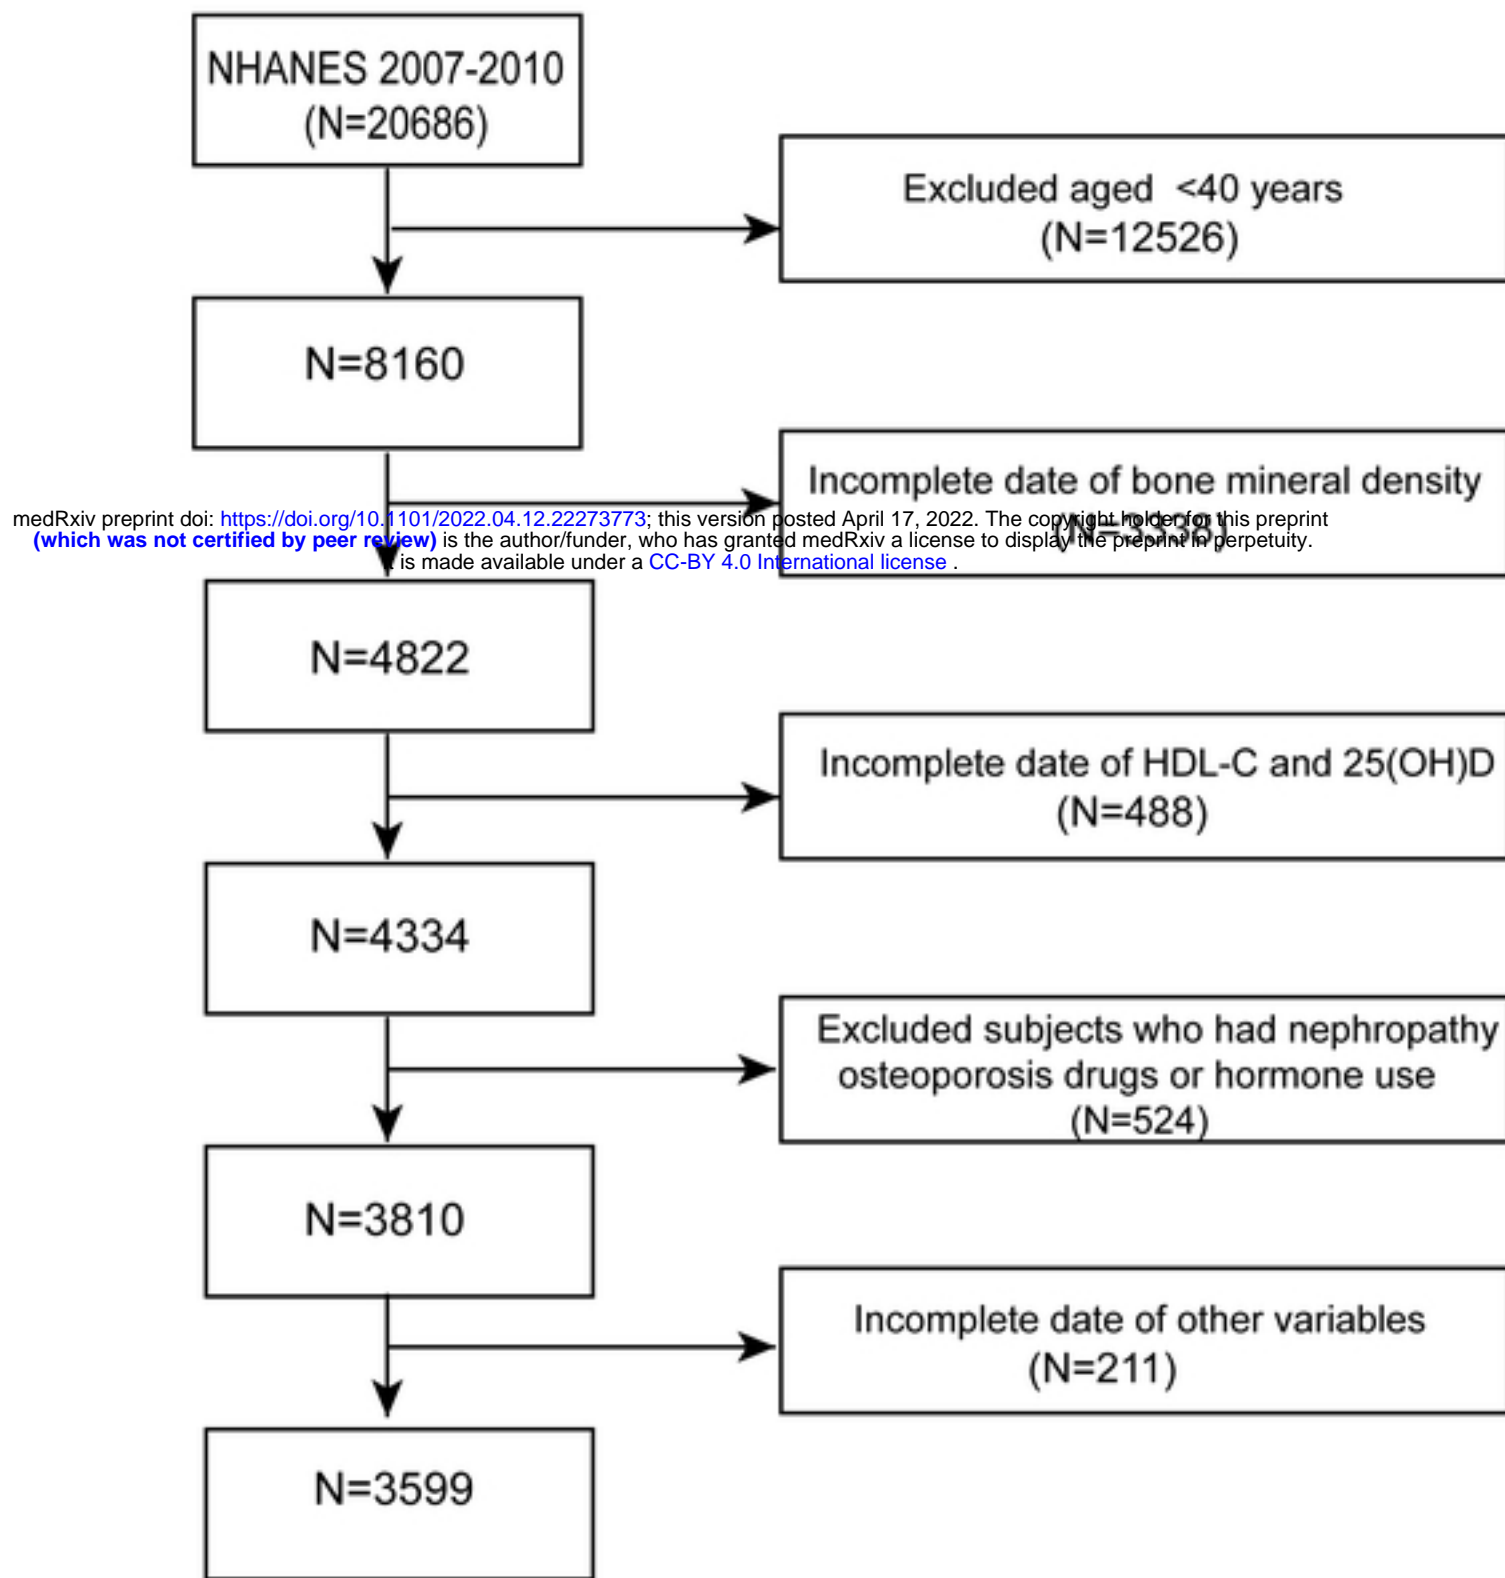

Figure 1

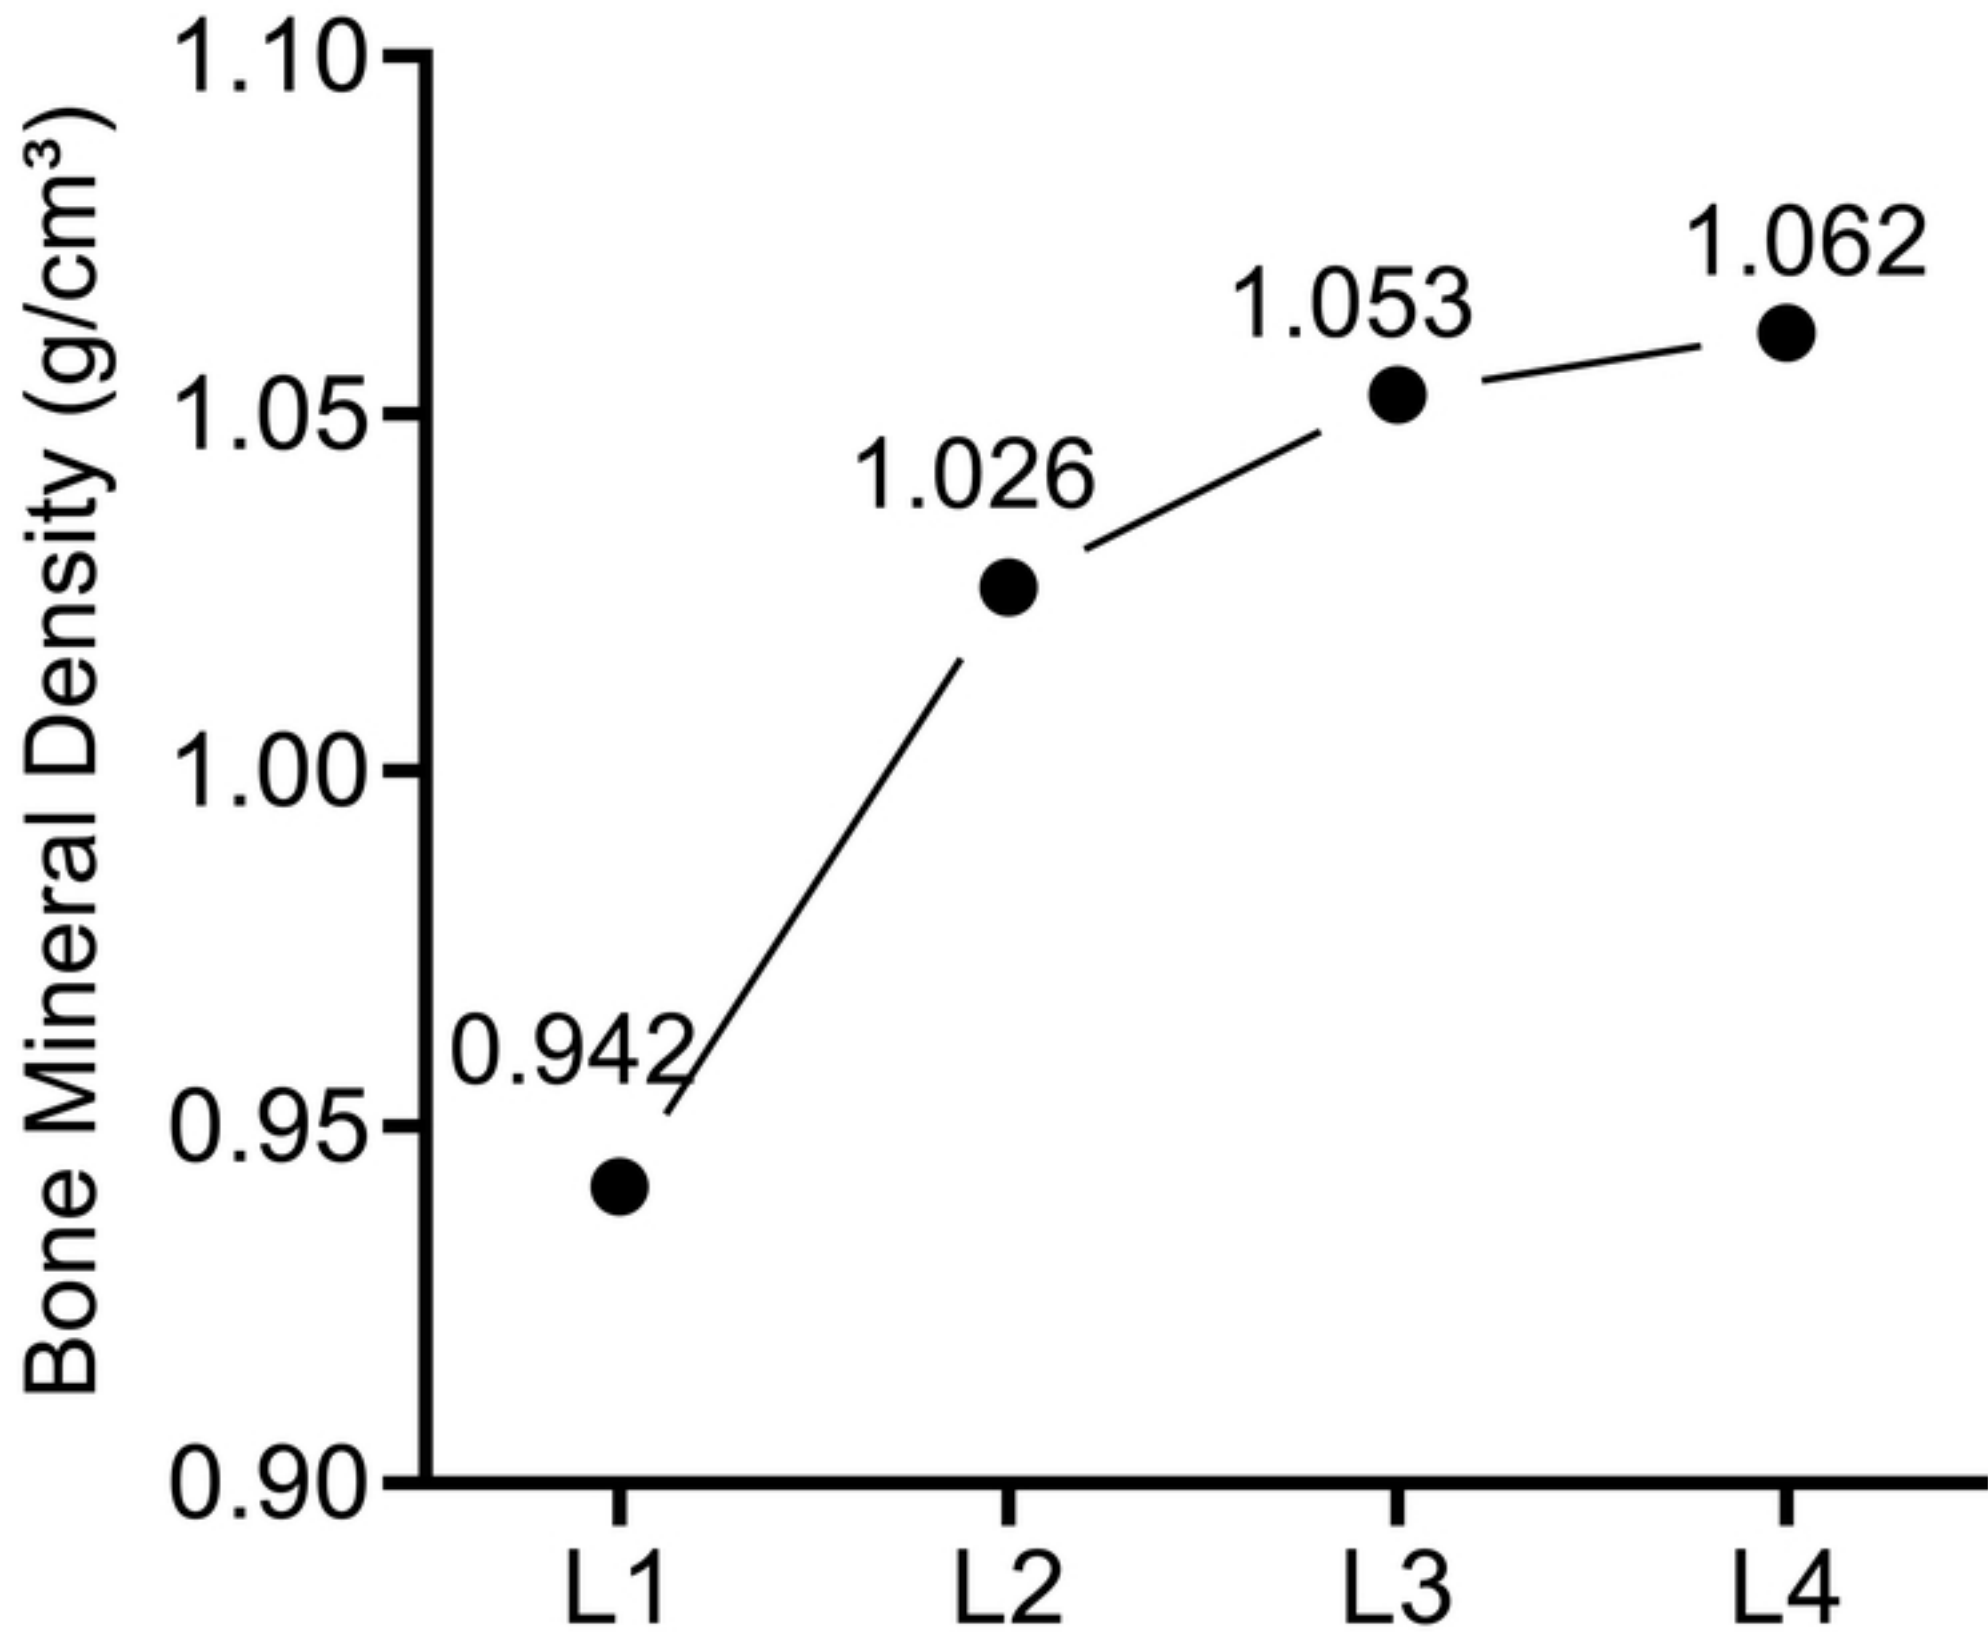

Figure2

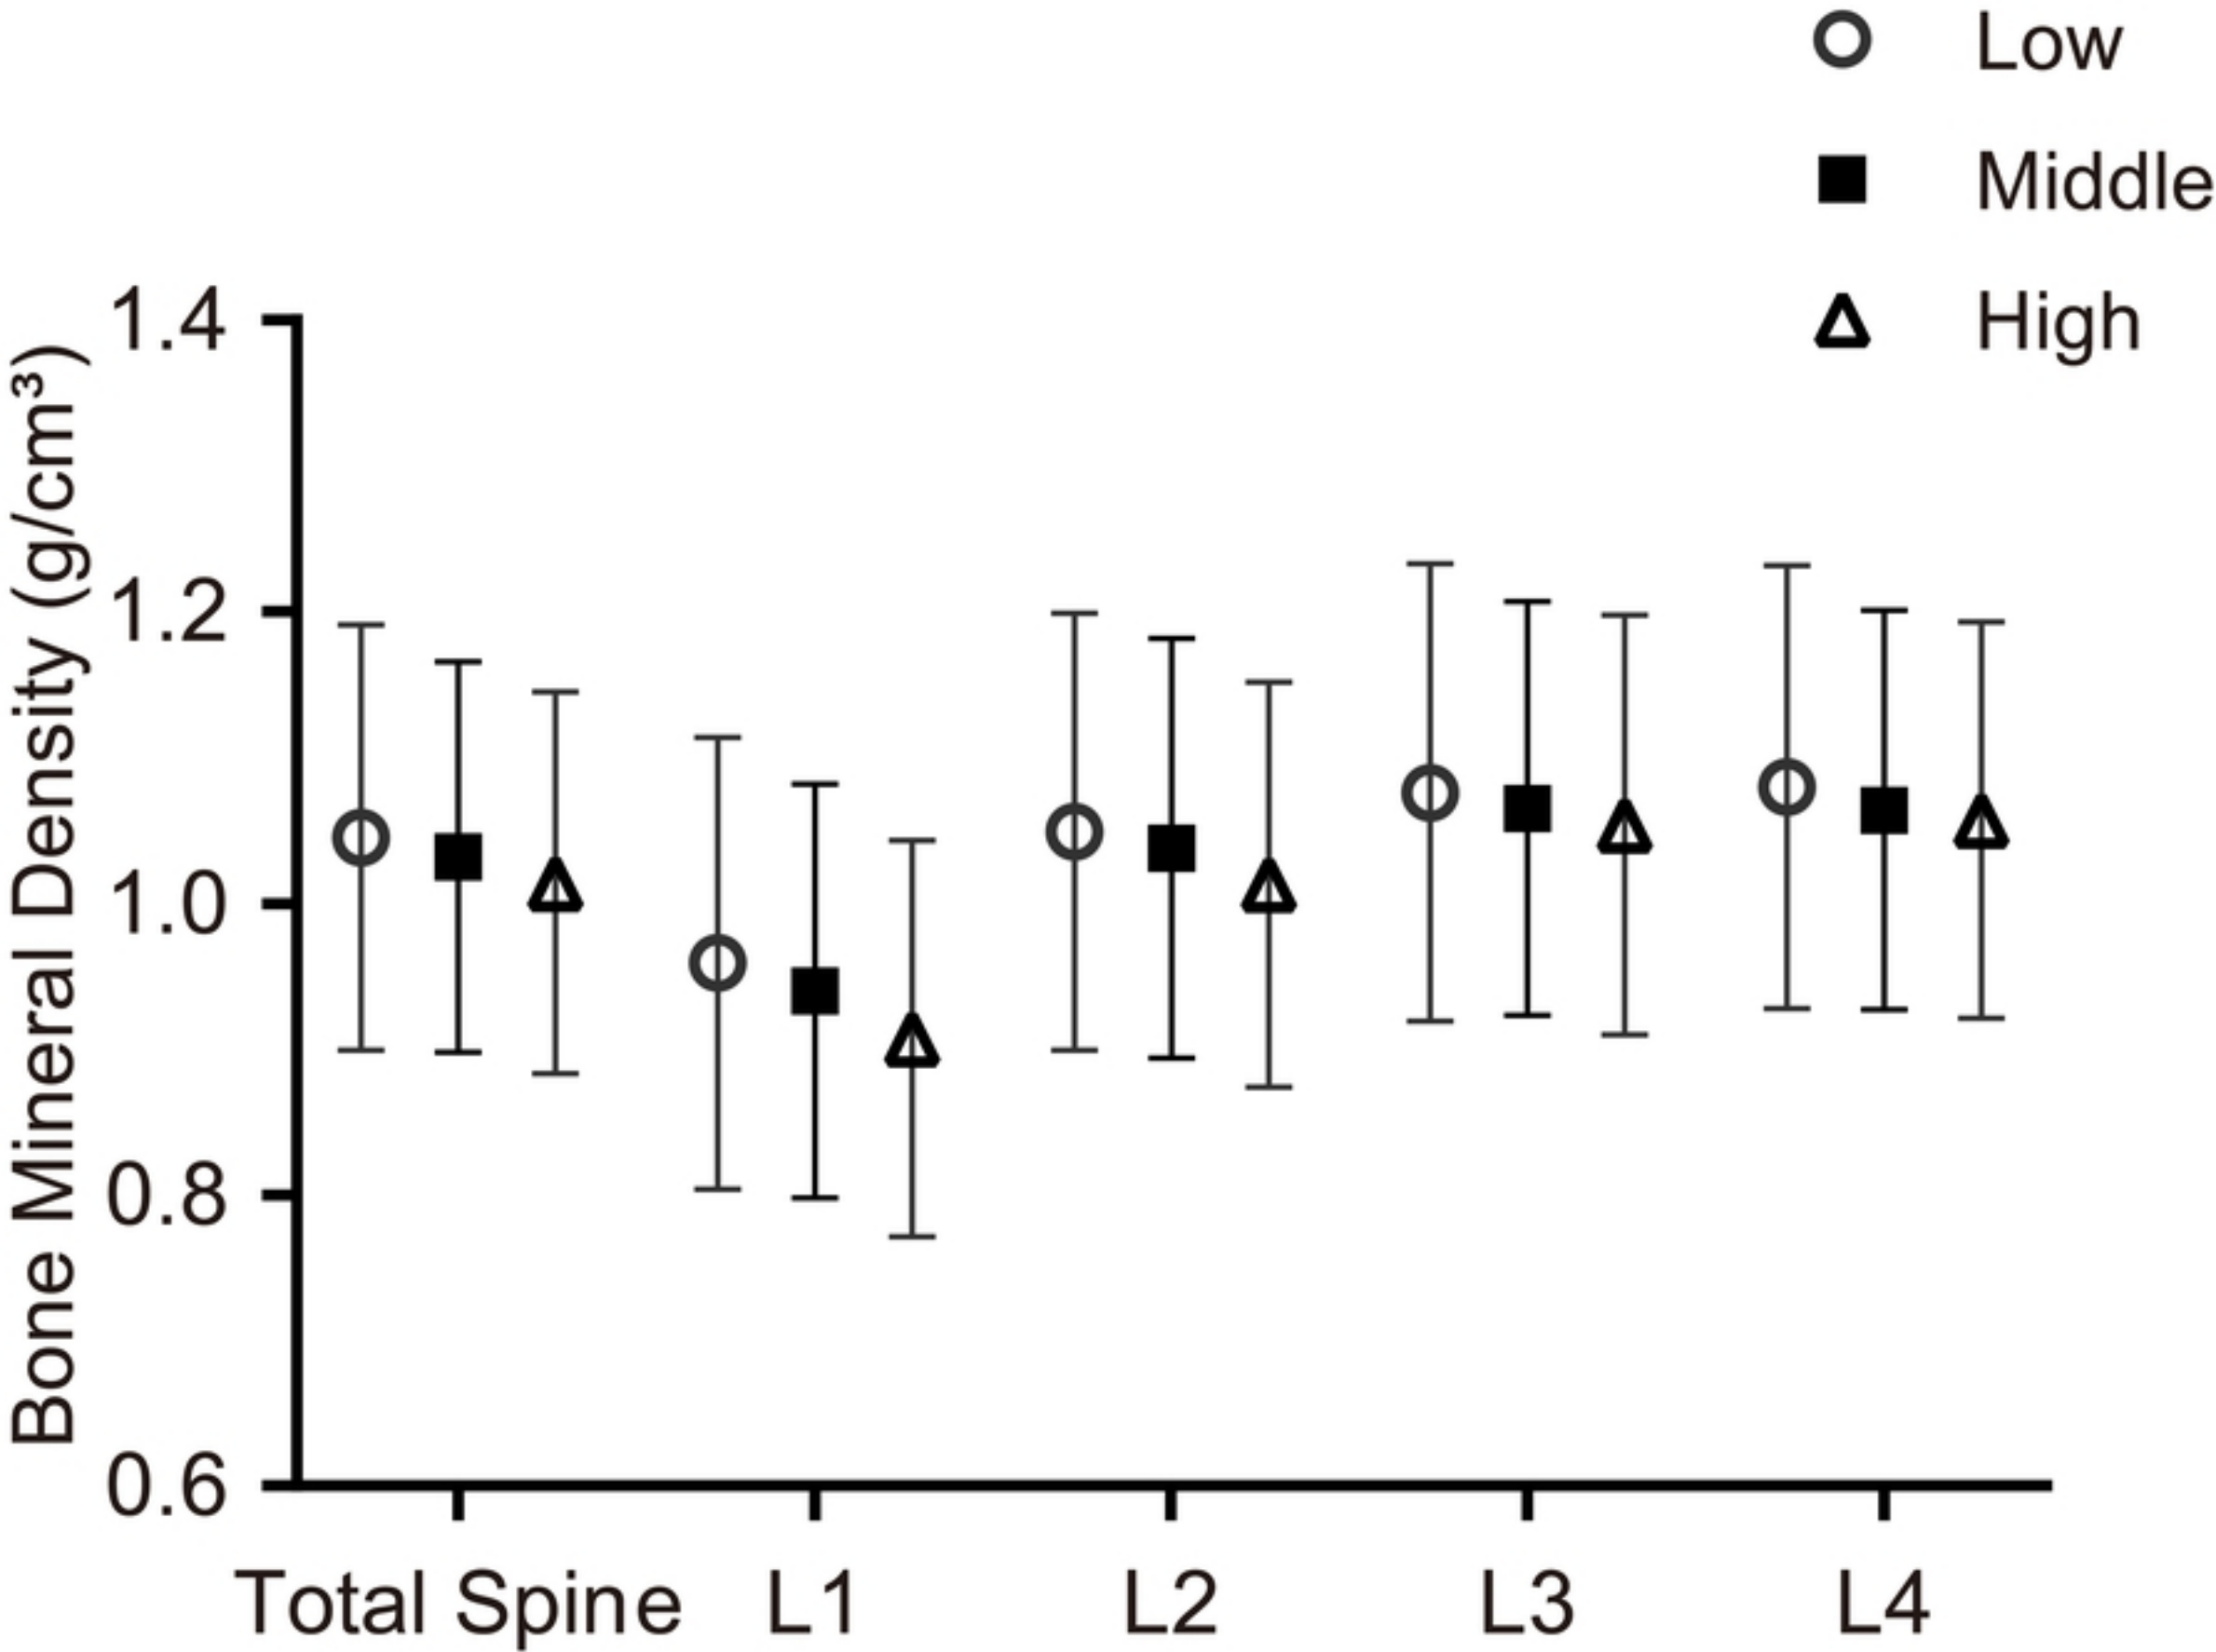

Figure3

**Table 1** Characteristics of study sample: US population aged ≥40 years in the NHANES 2007-2010.

| Characteristics                                     | Total number of participants (n=3599) |                | P       |
|-----------------------------------------------------|---------------------------------------|----------------|---------|
|                                                     | Men (n=1814)                          | Women (n=1785) |         |
| Age (years, mean ± SD)                              | 54.09 ± 10.33                         | 54.11 ± 10.44  | 0.9449  |
| Race/ethnicity, n (%)                               |                                       |                | 0.6246  |
| Mexican American                                    | 338 (7.32) %                          | 362 (7.08) %   |         |
| Other Hispanic                                      | 194 (3.99) %                          | 201 (4.02) %   |         |
| Non-Hispanic White                                  | 893 (74.64) %                         | 848 (74.27) %  |         |
| Non-Hispanic Black                                  | 321 (8.78) %                          | 317 (10.07) %  |         |
| Other Race                                          | 68 (5.27) %                           | 57 (4.56) %    |         |
| Education, n (%)                                    |                                       |                | 0.3241  |
| Under high school                                   | 561 (18.97) %                         | 593 (17.47) %  |         |
| High school or equivalent                           | 415 (23.26) %                         | 403 (23.57) %  |         |
| Some College or AA degree                           | 427 (26.88) %                         | 484 (29.35) %  |         |
| College Graduate or above                           | 411 (31.59) %                         | 365 (29.61) %  |         |
| BMI, mean ± SD (kg/m <sup>2</sup> )                 | 28.53 ± 4.70                          | 28.12 ± 6.26   | 0.0286  |
| Smoking, n(%)                                       |                                       |                | <0.0001 |
| Never                                               | 441 (22.96) %                         | 318 (18.19) %  |         |
| Former                                              | 584 (29.19) %                         | 381 (22.90) %  |         |
| Current                                             | 789 (47.84) %                         | 1086 (58.92) % |         |
| Had at least 12 alcohol drinks past one year? n (%) |                                       |                | <0.0001 |
| Yes                                                 | 1501 (85.03) %                        | 1058 (67.82) % |         |
| No                                                  | 313 (14.97) %                         | 727 (32.18) %  |         |
| Marital status                                      |                                       |                | <0.0001 |
| Live with someone                                   | 1327 (77.20) %                        | 1043 (66.13) % |         |
| Live alone                                          | 487 (22.80) %                         | 742 (33.87) %  |         |
| Hypertension, n (%)                                 |                                       |                | 0.1586  |
| Yes                                                 | 714 (35.98) %                         | 715 (33.74) %  |         |
| No                                                  | 1100 (64.02) %                        | 1070 (66.26) % |         |
| Diabetes, n (%)                                     |                                       |                | 0.2750  |
| Yes                                                 | 254 (10.23) %                         | 247 (8.69) %   |         |
| No                                                  | 1521 (87.97) %                        | 1505 (89.61) % |         |
| Borderline                                          | 39 (1.79) %                           | 33 (1.70) %    |         |
| Total 25(OH)D (nmol/l)                              | 67.04 ± 22.53                         | 70.99 ± 27.31  | <0.0001 |
| Phosphorus (mmol/L, mean ± SD)                      | 1.16 ± 0.18                           | 1.25 ± 0.17    | <0.0001 |
| Total calcium (mmol/L, mean ± SD)                   | 2.35 ± 0.09                           | 2.36 ± 0.09    | 0.1269  |
| CRP (mmol/L, mean ± SD)                             | 0.28 ± 0.59                           | 0.41 ± 0.76    | <0.0001 |
| HDL-C (mmol/L, mean ± SD)                           | 1.24 ± 0.38                           | 1.55 ± 0.45    | <0.0001 |
| TC (mmol/L, mean ± SD)                              | 5.19 ± 1.09                           | 5.39 ± 1.04    | <0.0001 |
| ALP (U/L, mean ± SD)                                | 66.98 ± 20.58                         | 68.47 ± 22.09  | 0.0359  |
| ALT (U/L, mean ± SD)                                | 30.77 ± 25.05                         | 22.24 ± 13.05  | <0.0001 |
| AST (U/L, mean ± SD)                                | 28.49 ± 16.87                         | 24.51 ± 11.28  | <0.0001 |
| Total spine BMD (g/cm <sup>2</sup> , mean ± SD)     | 1.06 ± 0.15                           | 1.00 ± 0.14    | <0.0001 |
| L1 BMD (g/cm <sup>2</sup> , mean ± SD)              | 1.00 ± 0.14                           | 0.90 ± 0.15    | <0.0001 |

medRxiv preprint doi: <https://doi.org/10.1101/2021.04.12.22273773>; this version posted April 17, 2021. The copyright holder for this preprint (which was not certified by peer review) is the author/funder, who has granted medRxiv a license to display the preprint in perpetuity. It is made available under a [CC-BY 4.0 International license](https://creativecommons.org/licenses/by/4.0/).

|                                        |             |             |         |
|----------------------------------------|-------------|-------------|---------|
| L2 BMD (g/cm <sup>2</sup> , mean ± SD) | 1.07 ± 0.15 | 1.00 ± 0.15 | <0.0001 |
| L3 BMD (g/cm <sup>2</sup> , mean ± SD) | 1.08 ± 0.16 | 1.04 ± 0.15 | <0.0001 |
| L4 BMD (g/cm <sup>2</sup> , mean ± SD) | 1.08 ± 0.16 | 1.04 ± 0.15 | <0.0001 |

NHANES = National Health and Nutrition Examination Survey; SD = standard deviation; Values are mean ± SD or n (%).  
HDL-C = high-density lipoprotein cholesterol; BMI = Body mass index; CRP = C-reactive protein; TC = Cholesterol; ALP = Alkaline phosphatase; ALT = Alanine aminotransferase; AST = Aspartate aminotransferase; BMD = bone mineral density ; CI = confidence interval; β regression coefficient

**Table 2** Correlation between high-density lipoprotein-cholesterol and bone mineral density

| BMD         | Model1                  |          | Model2                  |          | Model3                  |         |
|-------------|-------------------------|----------|-------------------------|----------|-------------------------|---------|
|             | $\beta$ (95%CI)         | P        | $\beta$ (95%CI)         | P        | $\beta$ (95%CI)         | P       |
| Total spine | -0.055 (-0.066, -0.044) | <0.00001 | -0.043 (-0.054, -0.032) | <0.00001 | -0.018 (-0.031, -0.006) | 0.00373 |
| L1          | -0.082 (-0.093, -0.071) | <0.00001 | -0.053 (-0.064, -0.042) | <0.00001 | -0.026 (-0.038, -0.013) | 0.00005 |
| L2          | -0.062 (-0.073, -0.050) | <0.00001 | -0.045 (-0.056, -0.033) | <0.00001 | -0.021 (-0.034, -0.008) | 0.00133 |
| L3          | -0.044 (-0.055, -0.032) | <0.00001 | -0.041 (-0.053, -0.028) | <0.00001 | -0.016 (-0.029, -0.002) | 0.02179 |
| L4          | -0.041 (-0.053, -0.030) | <0.00001 | -0.037 (-0.049, -0.025) | <0.00001 | -0.014 (-0.027, -0.000) | 0.04453 |

Model1, no covariates were adjusted

Model2, age, sex, race / ethnicity, were adjusted

Model3, age, sex, race/ethnicity, Education, Smoking, Had at least 12 alcohol drinks past one year?, Marital status,

Hypertension, Diabetes, Total 25(OH)D, BMI (obese, overweight, normal), TC (quartile groups), Ca (quartile groups), P

(quartile groups), ALP (quartile groups), ALT (quartile groups), AST (quartile groups), CRP (quartile groups) were adjusted in

the model. It is made available under a [CC-BY 4.0 International license](https://creativecommons.org/licenses/by/4.0/).

medRxiv preprint doi: <https://doi.org/10.1101/2022.04.12.22273773>; this version posted April 17, 2022. The copyright holder for this preprint (which was not certified by peer review) is the author/funder, who has granted medRxiv a license to display the preprint in perpetuity.

**Table 3** Correlation between high-density lipoprotein cholesterol and bone mineral density based on 25(OH)D status classification

| BMD         | Total 25(OH)<75 (nmol/l) (n=2565) |         | Total 25(OH)≥75 (nmol/l) (n=1034) |        |
|-------------|-----------------------------------|---------|-----------------------------------|--------|
|             | Adjust β (95% CI)                 | P       | Adjust β (95% CI)                 | P      |
| Total spine | -0.024 (-0.040, -0.008)           | 0.0033  | -0.007 (-0.028, 0.014)            | 0.5062 |
| L1          | -0.032 (-0.048, -0.016)           | <0.0001 | -0.013 (-0.033, 0.008)            | 0.2315 |
| L2          | -0.025 (-0.042, -0.009)           | 0.0025  | -0.010 (-0.032, 0.012)            | 0.3622 |
| L3          | -0.020 (-0.037, -0.002)           | 0.0289  | -0.008 (-0.031, 0.015)            | 0.4913 |
| L4          | -0.022 (-0.039, -0.005)           | 0.0131  | -0.000 (-0.023, 0.023)            | 0.9929 |

Age, sex, race/ethnicity, Education, Smoking, Had at least 12 alcohol drinks past one year?, Marital status, Hypertension, Diabetes, BMI (obese, overweight, normal), TC (quartile groups), Ca (quartile groups), P (quartile groups), ALP (quartile groups), ALT (quartile groups), AST (quartile groups), CRP (quartile groups) were adjusted in the model.

medRxiv preprint doi: <https://doi.org/10.1101/2022.04.12.22273773>; this version posted April 17, 2022. The copyright holder for this preprint (which was not certified by peer review) is the author/funder, who has granted medRxiv a license to display the preprint in perpetuity. It is made available under a [CC-BY 4.0 International license](https://creativecommons.org/licenses/by/4.0/).



**Table 4** Correlation between high-density lipoprotein cholesterol and bone mineral density based on Gender and Age status classification

| BMD         | Age               | Male (n=1341)           |        | Female (n=1224)         |        |
|-------------|-------------------|-------------------------|--------|-------------------------|--------|
|             |                   | Adjust $\beta$ (95% CI) | P      | Adjust $\beta$ (95% CI) | P      |
| Total spine | 40 $\leq$ Aged<50 | -0.007 (-0.048, 0.034)  | 0.7390 | -0.038 (-0.068, -0.007) | 0.0161 |
|             | 50 $\leq$ Aged<60 | -0.024 (-0.074, 0.026)  | 0.3507 | -0.053 (-0.097, -0.010) | 0.0176 |
|             | 60 $\leq$ Aged<70 | 0.008 (-0.045, 0.060)   | 0.7749 | -0.015 (-0.060, 0.031)  | 0.5271 |
|             | 70 $\leq$ Aged    | -0.006 (-0.076, 0.065)  | 0.8730 | -0.028 (-0.108, 0.052)  | 0.4989 |
| L1          | 40 $\leq$ Aged<50 | -0.003 (-0.045, 0.039)  | 0.8824 | -0.056 (-0.089, -0.024) | 0.0007 |
|             | 50 $\leq$ Aged<60 | -0.036 (-0.085, 0.013)  | 0.1538 | -0.063 (-0.110, -0.017) | 0.0076 |
|             | 60 $\leq$ Aged<70 | -0.017 (-0.068, 0.034)  | 0.5142 | -0.036 (-0.078, 0.006)  | 0.0984 |
|             | 70 $\leq$ Aged    | -0.004 (-0.070, 0.062)  | 0.9061 | -0.041 (-0.116, 0.034)  | 0.2909 |
| L3          | 40 $\leq$ Aged<50 | -0.016 (-0.058, 0.026)  | 0.4512 | -0.033 (-0.066, -0.001) | 0.0448 |
|             | 50 $\leq$ Aged<60 | -0.032 (-0.083, 0.019)  | 0.2233 | -0.042 (-0.088, 0.005)  | 0.0786 |
|             | 60 $\leq$ Aged<70 | -0.021 (-0.032, 0.074)  | 0.4453 | -0.016 (-0.063, 0.030)  | 0.4904 |
|             | 70 $\leq$ Aged    | -0.013 (-0.085, 0.059)  | 0.7291 | -0.052 (-0.130, 0.027)  | 0.1994 |
| L4          | 40 $\leq$ Aged<50 | 0.005 (-0.040, 0.050)   | 0.8314 | -0.027 (-0.060, 0.007)  | 0.1185 |
|             | 50 $\leq$ Aged<60 | -0.006 (-0.060, 0.049)  | 0.8375 | -0.059 (-0.107, -0.012) | 0.0144 |
|             | 60 $\leq$ Aged<70 | 0.020 (-0.038, 0.079)   | 0.4962 | -0.013 (-0.064, 0.039)  | 0.6255 |
|             | 70 $\leq$ Aged    | -0.013 (-0.089, 0.063)  | 0.7417 | -0.036 (-0.124, 0.053)  | 0.4286 |
| L4          | 40 $\leq$ Aged<50 | -0.014 (-0.058, 0.030)  | 0.5257 | -0.037 (-0.070, -0.005) | 0.0229 |
|             | 50 $\leq$ Aged<60 | -0.028 (-0.083, 0.027)  | 0.3198 | -0.048 (-0.094, -0.003) | 0.0396 |
|             | 60 $\leq$ Aged<70 | 0.005 (-0.054, 0.063)   | 0.8727 | -0.002 (-0.054, 0.049)  | 0.9323 |
|             | 70 $\leq$ Aged    | 0.005 (-0.076, 0.086)   | 0.9081 | 0.004 (-0.084, 0.092)   | 0.9277 |

medRxiv preprint doi: <https://doi.org/10.1101/2022.04.12.22273773>; this version posted April 17, 2022. The copyright holder for this preprint (which was not certified by peer review) is the author/funder, who has granted medRxiv a license to display the preprint in perpetuity. It is made available under a [CC-BY 4.0 International license](https://creativecommons.org/licenses/by/4.0/).

Race/ethnicity, Education, Smoking, Had at least 12 alcohol drinks past one year?, Marital status, Hypertension, Diabetes, Total 25(OH)D, BMI (obese, overweight, normal), TC (quartile groups), Ca (quartile groups), P (quartile groups), ALP (quartile groups), ALT (quartile groups), AST (quartile groups), CRP (quartile groups) were adjusted in the model.



**Table 5** Correlation between high-density lipoprotein cholesterol and bone mineral density based on covariate status classification.

| Covariant | TOTAL.SPINE               | L1                                | L2                                 | L3                                | L4                                |                                   |
|-----------|---------------------------|-----------------------------------|------------------------------------|-----------------------------------|-----------------------------------|-----------------------------------|
|           | $\beta$ (95%CI)           | $\beta$ (95%CI)                   | $\beta$ (95%CI)                    | $\beta$ (95%CI)                   | $\beta$ (95%CI)                   |                                   |
|           | P                         | P                                 | P                                  | P                                 | P                                 |                                   |
| RACE      | Mexican American          | -0.010 (-0.040, 0.020)<br>0.5094  | -0.020 (-0.051, 0.010)<br>0.1877   | -0.006 (-0.037, 0.025)<br>0.7073  | -0.005(-0.037,0.028)<br>0.7672    | -0.011 (-0.043, 0.022)<br>0.5212  |
|           | Other Hispanic            | -0.016 (-0.060, 0.027)<br>0.4570  | -0.041 (-0.086, 0.003)<br>0.0692   | -0.013 (-0.057, 0.032)<br>0.5779  | -0.017 (-0.064, 0.029)<br>0.4593  | -0.001 (-0.049, 0.046)<br>0.9517  |
|           | Non-Hispanic White        | -0.017 (-0.035, 0.001)<br>0.0720  | -0.021 (-0.039, -0.003)<br>0.0234  | -0.017 (-0.036, 0.002)<br>0.0760  | -0.016 (-0.036, 0.004)<br>0.1111  | -0.014 (-0.034, 0.005)<br>0.1548  |
|           | Non-Hispanic Black        | -0.041 (-0.069, -0.013)<br>0.0042 | -0.058 (-0.086, -0.030)<br><0.0001 | -0.052 (-0.081, -0.023)<br>0.0004 | -0.035 (-0.065, -0.005)<br>0.0232 | -0.026 (-0.057, 0.004)<br>0.0865  |
|           | Other Race                | 0.001 (-0.079, 0.080)<br>0.9551   | -0.003 (-0.084, 0.078)<br>0.9398   | -0.016 (-0.098, 0.067)<br>0.7084  | 0.009 (-0.079, 0.096)<br>0.8487   | 0.007 (-0.077, 0.092)<br>0.8704   |
| MARITAL   | Live with someone         | -0.020 (-0.036, -0.005)<br>0.0102 | -0.025 (-0.040, -0.009)<br>0.0016  | -0.021 (-0.037, -0.005)<br>0.0096 | -0.018 (-0.035, -0.001)<br>0.0350 | -0.019 (-0.036, -0.002)<br>0.0287 |
|           | Live alone                | -0.016 (-0.037, 0.005)<br>0.1323  | -0.027 (-0.048, -0.005)<br>0.0145  | -0.021 (-0.043, 0.001)<br>0.0571  | -0.014 (-0.037, 0.009)<br>0.2239  | -0.007 (-0.030, 0.015)<br>0.5284  |
| EDUCATION | Under high school         | -0.036 (-0.059, -0.013)<br>0.0024 | -0.033 (-0.057, -0.010)<br>0.0050  | -0.035 (-0.058, -0.011)<br>0.0041 | -0.035 (-0.060, -0.009)<br>0.0075 | -0.041 (-0.066, -0.016)<br>0.0014 |
|           | High school or equivalent | -0.023 (-0.050, 0.004)<br>0.0981  | -0.040 (-0.066, -0.014)<br>0.0029  | -0.030 (-0.058, -0.002)<br>0.0381 | -0.013 (-0.043, 0.017)<br>0.3883  | -0.015 (-0.045, 0.015)<br>0.3152  |
|           | Some College or AA degree | -0.018 (-0.044, 0.008)<br>0.1843  | -0.018 (-0.044, 0.009)<br>0.1928   | -0.019 (-0.046, 0.008)<br>0.1753  | -0.021 (-0.049, 0.007)<br>0.1337  | -0.014 (-0.043, 0.015)<br>0.3374  |
|           | College Graduate or above | 0.005 (-0.021, 0.031)<br>0.7104   | -0.009 (-0.035, 0.018)<br>0.5180   | -0.003 (-0.030, 0.025)<br>0.8579  | 0.008 (-0.020, 0.037)<br>0.5643   | 0.017 (-0.010, 0.045)<br>0.2208   |
| SMOKE     | Never                     | -0.020 (-0.047, 0.007)<br>0.1530  | -0.020 (-0.047, 0.007)<br>0.1445   | -0.029 (-0.057, -0.002)<br>0.0376 | -0.013 (-0.042, 0.016)<br>0.3885  | -0.019 (-0.048, 0.011)<br>0.2079  |
|           | Former                    | -0.008 (-0.033, 0.016)<br>0.5095  | -0.018 (-0.043, 0.006)<br>0.1370   | -0.010 (-0.035, 0.015)<br>0.4408  | -0.008 (-0.035, 0.019)<br>0.5690  | -0.001 (-0.028, 0.026)<br>0.9600  |
|           | Current                   | -0.028 (-0.045, -0.010)<br>0.0018 | -0.034 (-0.051, -0.016)<br>0.0002  | -0.028 (-0.046, -0.010)<br>0.0026 | -0.027 (-0.046, -0.008)<br>0.0057 | -0.025 (-0.044, -0.006)<br>0.0092 |
| ALP       | Q1                        | -0.024 (-0.047, -0.001)<br>0.0439 | -0.035 (-0.058, -0.011)<br>0.0037  | -0.033 (-0.056, -0.009)<br>0.0063 | -0.018 (-0.044, 0.007)<br>0.1577  | -0.014 (-0.039, 0.011)<br>0.2720  |
|           | Q2                        | -0.003 (-0.029, 0.023)<br>0.8126  | -0.011 (-0.037, 0.016)<br>0.4388   | -0.003 (-0.030, 0.025)<br>0.8383  | 0.002 (-0.027, 0.030)<br>0.9060   | -0.002 (-0.031, 0.026)<br>0.8683  |
|           | Q3                        | -0.016 (-0.043, 0.010)<br>0.2337  | -0.023 (-0.050, 0.003)<br>0.0852   | -0.012 (-0.040, 0.016)<br>0.4037  | -0.014 (-0.043, 0.015)<br>0.3326  | -0.019 (-0.048, 0.011)<br>0.2114  |
|           | Q4                        | -0.044 (-0.069, -0.018)<br>0.0008 | -0.045 (-0.070, -0.019)<br>0.0006  | -0.049 (-0.076, -0.022)<br>0.0003 | -0.047 (-0.076, -0.019)<br>0.0010 | -0.036 (-0.064, -0.009)<br>0.0095 |

Age, sex, Had at least 12 alcohol drinks past one year?, Hypertension, Diabetes, Total 25(OH)D, BMI (obese, overweight, normal), TC(quartile groups), Ca (quartile groups), P (quartile groups), ALT (quartile groups), AST (quartile groups), CRP (quartile groups) were adjusted in the model
